# Supplementary material
Source: publisher figshare collection journal article supplement (https://acs.figshare.com/ndownloader/files/3845842)
Supplement: Supplementary file 1 [file 3845842]

---

## Supplementary Materials

### **PBT/PC blends compatibilized and toughened via copolymers in-situ formed by MgO-catalyzed transesterification**

*Gong-Peng Lin, Ling Lin, Xiu-Li Wang\*, Li Chen\*, and Yu-Zhong Wang*

Center for Degradable and Flame-Retardant Polymeric Materials, College of Chemistry, State Key Laboratory of Polymer Materials Engineering, National Engineering Laboratory of Eco-Friendly Polymeric Materials (Sichuan), Sichuan University, Chengdu 610064, China

Table S1 Thermal properties of PBT, PC, BPM520 and their blends

| Sample    | $T_{5\%}^a$<br>(°C) | $T_{max}^b$<br>(°C) | Rate of $T_{max}$<br>(%/min) | Residue at 700°C<br>(%) |
|-----------|---------------------|---------------------|------------------------------|-------------------------|
| PC        | 492.8               | 535.9               | 37.6                         | 23.3                    |
| BPM520    | 367.3               | 463.3               | 23.1                         | 0.0                     |
| Sample 12 | 419.0               | 540.2               | 34.8                         | 19.0                    |
| Sample 13 | 406.2               | 470.8               | 22.7                         | 13.6                    |
| PBT       | 382.2               | 413.3               | 49.9                         | 4.8                     |
| BPM520    | 367.3               | 463.3               | 23.1                         | 0.0                     |
| Sample 14 | 386.0               | 415.5               | 49.2                         | 5.6                     |
| Sample 15 | 385.6               | 414.0               | 48.8                         | 6.7                     |

<sup>a</sup>:  $T_{5\%}$  defined as the temperature at which 5wt% weight loss occurs

<sup>b</sup>:  $T_{max}$  defined as the temperature at which the maximum weight loss rate occurs

Table S2 DSC data of PBT/PC/BPM520/MgO blends

| Sample    | $T_{cc}^a$ (°C) | $\Delta H_{cc}^b$ (J/g) | $T_c$ (°C) | $\Delta H_m^c$ (J/g) | $X_c^d$ (%) |
|-----------|-----------------|-------------------------|------------|----------------------|-------------|
| PBT       | 54.8            | 0.9                     | 191.0      | 48.1                 | 32.4        |
| Sample 1  | 57.0            | 2.7                     | 183.2      | 33.0                 | 31.2        |
| Sample 2  | 58.2            | 2.9                     | 170.7      | 31.2                 | 30.7        |
| Sample 6  | 65.8            | 3.9                     | 165.2      | 30.9                 | 29.3        |
| Sample 7  | 83.5            | 10.4                    | 165.9      | 35.6                 | 27.4        |
| Sample 11 | 86.7            | 13.7                    | 175.3      | 31.9                 | 18.8        |

a: The cold crystallization temperature

b: The enthalpy value of cold crystallization

c: The normalized melting enthalpy

d: Crystallinity of PBT-phase calculated by

$$X_c = \frac{(\Delta H_m - \Delta H_{cc})/\text{weight}\%}{\Delta H_m^0}$$

Weight% is the quality percentage of PBT in PBT/PC blends, and  $\Delta H_m^0$  is the melting enthalpy of a 100%

crystalline PBT (145.5 J/g).<sup>1</sup>

Table S3 DMA data of PBT/PC/BPM520/MgO blends

| Sample    | T <sub>g</sub> 1(°C) | T <sub>g</sub> 2(°C) | ΔT <sub>g</sub> (°C) |
|-----------|----------------------|----------------------|----------------------|
| PBT       | 65.5                 | -                    | -                    |
| PC        | 166.1                | -                    | -                    |
| Sample 1  | 89.6                 | 138.7                | 49.1                 |
| Sample 2  | 94.6                 | 139.1                | 44.5                 |
| Sample 6  | 98.0                 | 134.0                | 36.0                 |
| Sample 7  | 90.3                 | -                    | 0.0                  |
| Sample 11 | 77.6                 | 103.4                | 25.8                 |

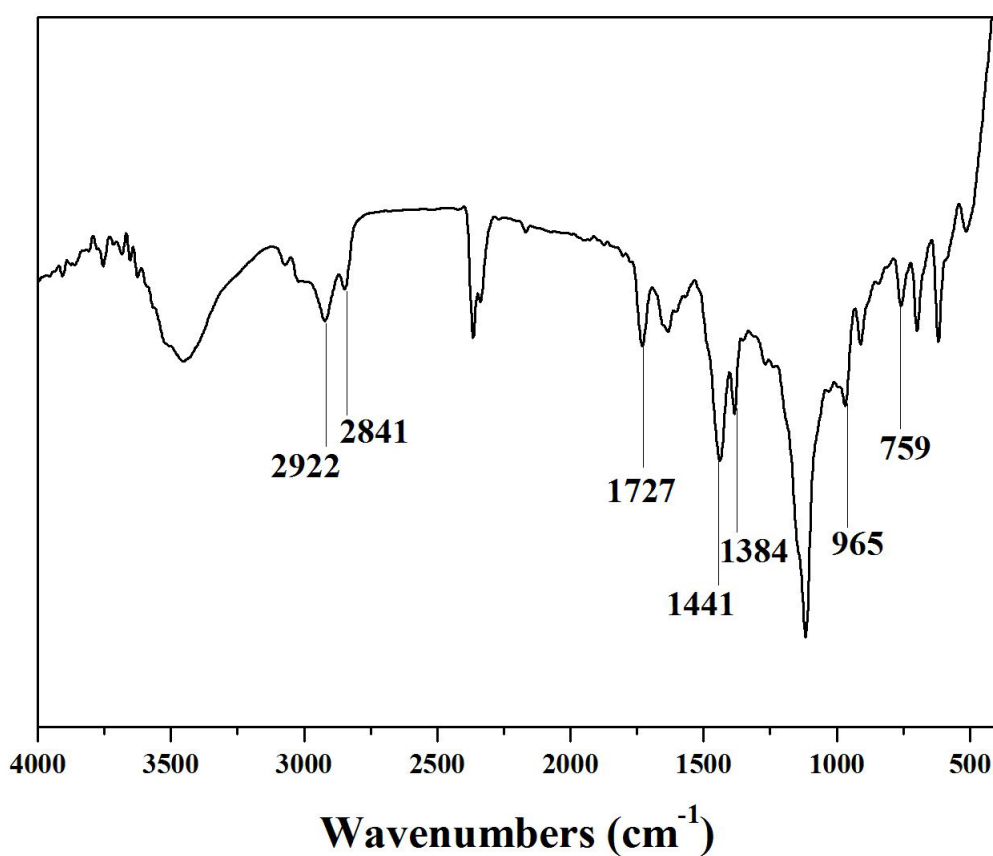

Figure S1 FTIR spectrum of BPM520

Figure S1 shows the FTIR spectrum of BPM520. The peak at 759 cm<sup>-1</sup> is assigned to CH<sub>2</sub> coupling with C–C skeletal stretching vibration. The peak at 965 cm<sup>-1</sup> for C–O–C stretching vibration is obvious. Split peaks at 1384 and 1441 cm<sup>-1</sup> are

assigned to CH<sub>2</sub> or CH<sub>3</sub> stretching. The peak at 1727 cm<sup>-1</sup> is assigned to stretching frequency of C=O. And the peak at 2841 and 2922 cm<sup>-1</sup> are assigned to C-H stretching of CH<sub>2</sub> or CH<sub>3</sub>. All the characteristic absorption peaks means that BPM520 is consisted of acrylic-based resin<sup>2</sup> and PMMA<sup>3,4</sup>. However, because BMP520 cannot be dissolved in common solvent, and its signals in solid state nuclear magnetic resonance spectrum are weak, we cannot determined its detailed composition at present.

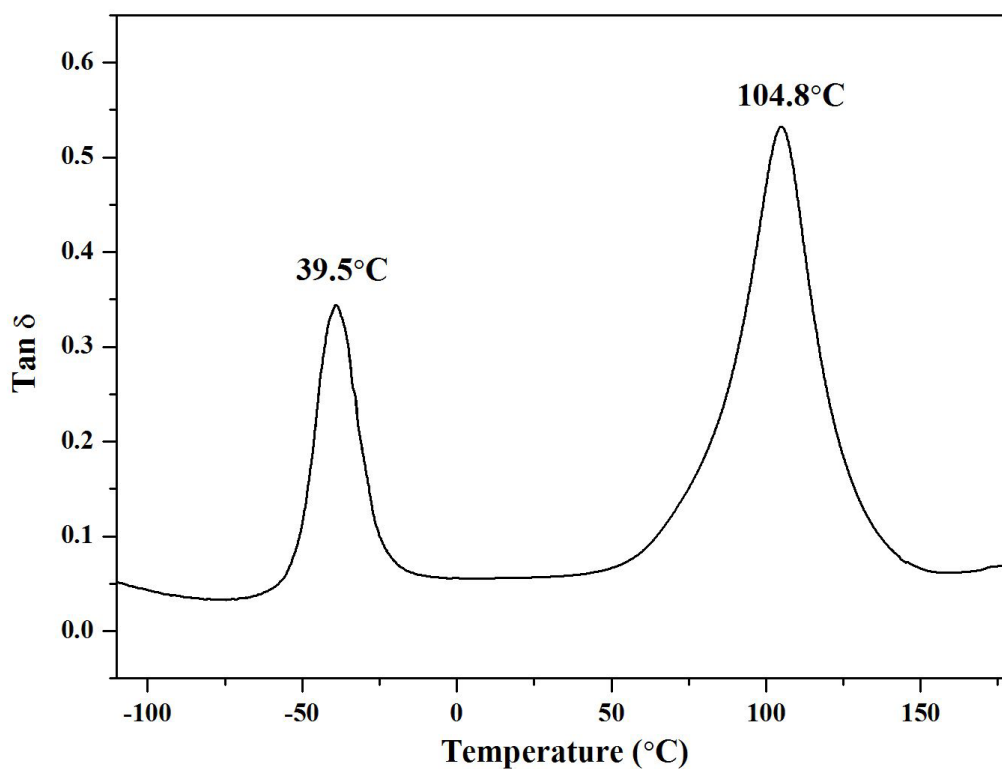

Figure S2 Tanδ vs temperature curve of BPM520 obtained from DMA test

In the DMA experimental temperature range (-110-180 °C), Tanδ vs temperature curve of BPM520 exhibits two clearly glass transition temperatures (39.5°C and 104.8°C), which are ascribed to acrylic-based resin<sup>5</sup> and PMMA<sup>6</sup>, respectively.

- 
- (1) Chen, J.; Huang, W.; Xu, Q.; Tu, Y.; Zhu, X.; Chen, E. PBT-b-PEO-b-PBT triblock copolymers: Synthesis, characterization and double-crystalline properties. *Polymer* **2013**, *54*, 6725.
2. Taenghom, T.; Pan, Q.; Rempel, G. L.; Kiatkamjornwong, S., Synthesis and characterization of nano-sized poly (butyl acrylate)-co-(methyl methacrylate)-co-(methacrylic acid) latex via differential microemulsion polymerization. *Colloid. Polym. Sci.* **2013**, *291*, 1365.
- (3) Tighilt, F. Z.; Gabouze, N.; Sam, S.; Belhousse, S.; Beldjilali, K., Morphology and specific interaction of PMMA coating with the surface of porous silicon. *Surf. Sci.* **2007**, *601*, 4217.
- (4) Abdelrazek, E. M.; El Damrawi, G.; Elashmawi, I. S.; El-Shahawy, A., The influence of gamma-irradiation on some physical properties of chlorophyll/PMMA films. *Appl. Surf. Sci.* **2010**, *256*, 2711.
- (5) Ilcikova, M.; Mrlik, M.; Sedlacek, T.; Slouf, M.; Zhigunov, A.; Koynov, K.; Mosnacek, J. Synthesis of Photoactuating Acrylic Thermoplastic Elastomers Containing Diblock Copolymer-Grafted Carbon Nanotubes. *Acs Macro Letters* **2014**, *3*, 999.
- (6) Ji, W. F.; Chang, K. C.; Lai, M. C.; Li, C. W.; Hsu, S. C.; Chuang, T. L.; Yeh, J. M.; Liu, W. R. Preparation and comparison of the physical properties of PMMA/thermally reduced graphene oxides composites with different carboxylic group content of thermally reduced graphene oxides. *Composites Part A* **2014**, *65*, 108.
